# Supplementary material for: Application of the COM-B model to barriers and facilitators to chlamydia testing in general practice for young people and primary care practitioners: a systematic review
Source: PubMed Central journal article supplement (PMC6196559; doi:10.1186/s13012-018-0821-y), 2018-10-22
Supplement: 13012_2018_821_MOESM3_ESM.pdf [file 13012_2018_821_MOESM3_ESM.pdf]

**Additional File 3.** Findings of included studies with primary care professionals, by level (young people, provider, service), and sub-component (COM-B)

Heading abbreviations: COM-B = capability, opportunity, motivation, behaviour; Y = young people; P = provider level; S = service level; PhC = physical capability; PsC = psychological capability; RM = reflective motivation; AM = automatic motivation; PO = physical opportunity; SO = social opportunity

| Source                | Barriers                                                                                                                                   | Level |   |   | COM-B Subcomponent |     |    |    |    |    | Facilitators                                                                                                                 | Level |   |   | COM-B Subcomponent |     |    |    |    |    |
|-----------------------|--------------------------------------------------------------------------------------------------------------------------------------------|-------|---|---|--------------------|-----|----|----|----|----|------------------------------------------------------------------------------------------------------------------------------|-------|---|---|--------------------|-----|----|----|----|----|
|                       |                                                                                                                                            | Y     | P | S | PhC                | PsC | RM | AM | PO | SO |                                                                                                                              | Y     | P | S | PhC                | PsC | RM | AM | PO | SO |
| Allison et al. (2017) | Assumptions about patients: if a patient wanted to be tested for chlamydia, they would just pick up a self-screening kit                   |       | ✓ |   |                    |     | ✓  |    |    |    | Regular updates circulated to all staff - initially staff were motivated and focussed, but as time passed, was not sustained |       | ✓ | ✓ |                    |     |    | ✓  |    |    |
|                       | Assumptions about patients: preference for receiving sexual health advice from services other than general practices                       |       | ✓ |   |                    |     | ✓  |    |    |    | Well displayed posters                                                                                                       |       |   | ✓ |                    |     |    |    | ✓  |    |
|                       | Assumptions about patients: concerns regarding lack of confidentiality in general practice, if patient's family is known to practice staff |       | ✓ |   |                    |     |    | ✓  |    |    | Phrase the offer correctly, emphasise the routine, non-judgemental nature of the offer                                       | ✓     | ✓ | ✓ |                    | ✓   |    |    |    | ✓  |
|                       | Perception that young men do not attend frequently                                                                                         |       | ✓ |   |                    |     |    | ✓  |    |    | Financial incentives could make a small difference                                                                           |       |   | ✓ |                    |     |    | ✓  |    |    |
|                       | Perception that patients are offended and feel judged if offered in a non- sexual health consultation                                      |       | ✓ |   |                    |     |    | ✓  |    |    | Short but regular training slots, mandatory training                                                                         |       |   | ✓ | ✓                  |     |    |    |    |    |
|                       | Some reception staff felt uncomfortable handing out invitation cards to patients                                                           |       | ✓ | ✓ |                    |     |    |    | ✓  |    |                                                                                                                              |       |   |   |                    |     |    |    |    |    |
|                       | Targets set to gain financial incentives were unrealistically high                                                                         |       |   | ✓ |                    |     |    | ✓  |    |    |                                                                                                                              |       |   |   |                    |     |    |    |    |    |
|                       | Lack of time and competing priorities (patients attending with more than one issue to discuss)                                             | ✓     | ✓ | ✓ |                    |     |    |    |    | ✓  |                                                                                                                              |       |   |   |                    |     |    |    |    |    |
|                       | Lack of privacy in the reception area                                                                                                      |       |   | ✓ |                    |     |    |    |    |    | ✓                                                                                                                            |       |   |   |                    |     |    |    |    |    |
| Bilardi et al. (2010) | Lack of provider education and awareness                                                                                                   |       | ✓ | ✓ |                    |     | ✓  |    |    |    | Financial incentives for GPs (41%)                                                                                           |       |   | ✓ |                    |     |    | ✓  |    |    |
|                       | Forgetting: Many initially increased testing at the start of the trial, but over time did not remember to offer testing, and/or            |       | ✓ |   |                    |     | ✓  |    |    |    | Patient education or awareness about testing (31%)                                                                           | ✓     |   |   | ✓                  |     |    |    |    |    |

|                       |                                                                                                                                                      |   |   |   |   |   |   |   |                                                                  |                                                                                                                  |   |   |   |   |   |  |  |   |   |   |   |
|-----------------------|------------------------------------------------------------------------------------------------------------------------------------------------------|---|---|---|---|---|---|---|------------------------------------------------------------------|------------------------------------------------------------------------------------------------------------------|---|---|---|---|---|--|--|---|---|---|---|
|                       | forgot about the incentive payment                                                                                                                   |   |   |   |   |   |   |   |                                                                  |                                                                                                                  |   |   |   |   |   |  |  |   |   |   |   |
|                       |                                                                                                                                                      |   |   |   |   |   |   |   |                                                                  | Computer prompts or reminders to test (26%)                                                                      |   |   | ✓ |   | ✓ |  |  |   |   |   |   |
| Bilardi et al. (2009) | Lack of time                                                                                                                                         |   | ✓ | ✓ | ✓ |   |   |   |                                                                  |                                                                                                                  |   |   |   |   |   |  |  |   |   |   |   |
|                       | Discomfort with raising the issue of testing                                                                                                         |   | ✓ |   |   |   |   | ✓ |                                                                  |                                                                                                                  |   |   |   |   |   |  |  |   |   |   |   |
|                       | Difficulty in remembering to refer patients                                                                                                          |   | ✓ |   |   | ✓ |   |   |                                                                  |                                                                                                                  |   |   |   |   |   |  |  |   |   |   |   |
| Calamai et al. (2013) | Perception that they did not see too many high-risk patients and therefore did not offer testing                                                     |   | ✓ |   |   |   | ✓ |   |                                                                  |                                                                                                                  |   |   |   |   |   |  |  |   |   |   |   |
| Freeman et al. (2009) | Many staff thought posters and leaflets would cause offence                                                                                          |   |   | ✓ |   |   | ✓ |   |                                                                  | Leaflets: Pocket-sized, pictorial, reflect multi-cultural society                                                |   |   | ✓ |   |   |  |  |   | ✓ | ✓ |   |
|                       | Distribution of leaflets by receptionists was thought to be inappropriate - patients would be offended when being offered a leaflet in a public area | ✓ |   | ✓ |   |   | ✓ |   | ✓                                                                | Receptionists in high screening practices proactively gave patients in the at-risk age group a chlamydia leaflet |   | ✓ | ✓ | ✓ |   |  |  |   |   |   |   |
|                       | Reason for not offering test - perception that they 'did not see too many high-risk patients'                                                        |   | ✓ |   |   |   | ✓ |   |                                                                  | Mobile phone texts rather than sending letters to patients' homes                                                |   |   | ✓ |   |   |  |  |   | ✓ |   |   |
|                       |                                                                                                                                                      |   |   |   |   |   |   |   |                                                                  | National television advertising                                                                                  |   |   | ✓ | ✓ |   |  |  |   |   |   | ✓ |
|                       |                                                                                                                                                      |   |   |   |   |   |   |   |                                                                  | Information on practice websites                                                                                 |   |   | ✓ |   |   |  |  |   |   |   | ✓ |
| Hocking et al. (2008) | Lack of time                                                                                                                                         |   | ✓ | ✓ | ✓ |   |   |   |                                                                  | Financial incentives for GPs, incentive payment available for each chlamydia test performed                      |   |   | ✓ |   |   |  |  | ✓ |   |   |   |
|                       | Lack of knowledge of GPs and the public about chlamydia                                                                                              | ✓ | ✓ | ✓ |   | ✓ |   |   |                                                                  | Funding for practice nurses                                                                                      |   |   | ✓ |   |   |  |  |   | ✓ |   |   |
|                       | Patient embarrassment                                                                                                                                | ✓ |   |   |   |   |   | ✓ |                                                                  | Education for GPs, PNs and the general public                                                                    | ✓ | ✓ | ✓ |   | ✓ |  |  |   |   |   |   |
|                       | Religious and cultural issues, need to be addressed in a sensitive and culturally appropriate way                                                    | ✓ |   | ✓ |   |   |   |   | ✓                                                                | National screening guidelines                                                                                    |   |   | ✓ |   | ✓ |  |  |   |   |   |   |
|                       | Women prefer to see a female GP for chlamydia testing                                                                                                |   | ✓ |   |   |   | ✓ |   |                                                                  | Introduction of a formal screening program with associated recall mechanisms                                     |   |   | ✓ |   | ✓ |  |  |   | ✓ |   |   |
|                       | Lack of a formal recall/reminder system for chlamydia testing                                                                                        |   |   | ✓ |   |   |   |   | ✓                                                                | Greater support for contact tracing                                                                              |   |   | ✓ |   |   |  |  |   | ✓ |   |   |
|                       | Lack of support for contact tracing                                                                                                                  |   |   | ✓ |   |   |   |   | ✓                                                                | Destigmatization                                                                                                 | ✓ |   |   |   |   |  |  |   |   | ✓ |   |
|                       |                                                                                                                                                      |   |   |   |   |   |   |   | Majority of GPs consider that it is important to be able to test |                                                                                                                  |   | ✓ |   |   |   |  |  |   | ✓ |   |   |

|                      |                                                                                                                    |   |   |   |  |   |   |   |   |  |                                                                                                                                            |   |   |   |   |   |   |  |   |
|----------------------|--------------------------------------------------------------------------------------------------------------------|---|---|---|--|---|---|---|---|--|--------------------------------------------------------------------------------------------------------------------------------------------|---|---|---|---|---|---|--|---|
|                      |                                                                                                                    |   |   |   |  |   |   |   |   |  | urines rather than swabs                                                                                                                   |   |   |   |   |   |   |  |   |
| Khan et al. (2006)   |                                                                                                                    |   |   |   |  |   |   |   |   |  | GPs who had postgraduate training in STIs had double the odds of offering testing to young men and to female patients at the time of smear |   | ✓ | ✓ | ✓ | ✓ |   |  |   |
| Lorch et al. (2013)  | Patients' lack of chlamydia knowledge (69%)                                                                        | ✓ |   |   |  | ✓ |   |   |   |  | Providers require additional training or skills to manage testing and treatment of chlamydia (89%)                                         |   | ✓ | ✓ | ✓ | ✓ |   |  |   |
|                      | Time constraints during consultations (53%)                                                                        |   | ✓ | ✓ |  |   |   |   | ✓ |  |                                                                                                                                            |   |   |   |   |   |   |  |   |
|                      | Lack of a formal chlamydia test recall/reminder system (46%)                                                       |   |   | ✓ |  |   |   |   | ✓ |  |                                                                                                                                            |   |   |   |   |   |   |  |   |
|                      | Lack of support for partner notification (46%)                                                                     |   |   | ✓ |  |   |   |   | ✓ |  |                                                                                                                                            |   |   |   |   |   |   |  |   |
|                      | Patient religion/ethnicity (33% )                                                                                  | ✓ |   |   |  |   |   |   | ✓ |  |                                                                                                                                            |   |   |   |   |   |   |  |   |
|                      | Lack of support for PNs (26%)                                                                                      |   |   | ✓ |  |   |   |   | ✓ |  |                                                                                                                                            |   |   |   |   |   |   |  |   |
|                      | Difficulty talking with clients about sexual health (21%)                                                          |   | ✓ |   |  |   | ✓ |   |   |  |                                                                                                                                            |   |   |   |   |   |   |  |   |
|                      | Cost of testing to client (21%)                                                                                    | ✓ |   | ✓ |  |   |   |   | ✓ |  |                                                                                                                                            |   |   |   |   |   |   |  |   |
|                      | The chance of patients getting a false positive result (10%)                                                       |   | ✓ |   |  |   | ✓ |   |   |  |                                                                                                                                            |   |   |   |   |   |   |  |   |
|                      | Concerns about over servicing (4%)                                                                                 |   | ✓ | ✓ |  |   |   |   | ✓ |  |                                                                                                                                            |   |   |   |   |   |   |  |   |
| Lorch et al. (2016)  | Time or workload constraints                                                                                       |   | ✓ | ✓ |  |   |   |   | ✓ |  |                                                                                                                                            |   |   |   |   |   |   |  |   |
|                      | Difficulty offering or discussing testing in a non-sexual health consultation                                      |   | ✓ |   |  |   |   | ✓ |   |  |                                                                                                                                            |   |   |   |   |   |   |  |   |
| Lorch et al. (2015a) | Concerns related to funding for PN: concerns about how their additional activities would be remunerated            |   |   | ✓ |  |   |   |   | ✓ |  | GPs felt that PNs had more time for patient education and advice                                                                           |   | ✓ | ✓ |   |   |   |  | ✓ |
|                      | PN workload: makes it difficult for them to expand their role                                                      |   |   | ✓ |  |   |   |   | ✓ |  | GPs felt that patients would find PNs easier to talk to and less intimidating than GPs                                                     | ✓ | ✓ |   |   |   | ✓ |  | ✓ |
|                      | PN role: issues of patient privacy and confidentiality related to living in a "small town" privacy/confidentiality | ✓ | ✓ | ✓ |  |   |   |   | ✓ |  | PN role: GPs could benefit through a reduction in their workload                                                                           |   | ✓ | ✓ |   |   |   |  | ✓ |
| Lorch et al. (2015b) | Time and workload constraints                                                                                      |   | ✓ | ✓ |  |   |   |   | ✓ |  | Perceived that patients would feel more comfortable engaging with a PN rather than a GP                                                    | ✓ |   | ✓ |   |   | ✓ |  |   |



|                           |                                                                                                                                                           |   |   |   |   |   |  |   |  |                                                                                                                                                                                         |   |   |   |   |   |   |  |  |   |   |
|---------------------------|-----------------------------------------------------------------------------------------------------------------------------------------------------------|---|---|---|---|---|--|---|--|-----------------------------------------------------------------------------------------------------------------------------------------------------------------------------------------|---|---|---|---|---|---|--|--|---|---|
|                           | women                                                                                                                                                     |   |   |   |   |   |  |   |  |                                                                                                                                                                                         |   |   |   |   |   |   |  |  |   |   |
|                           | Believed that such young people fear the stigma of attending for an STI test where they can be seen and identified as promiscuous                         | ✓ | ✓ |   |   |   |  | ✓ |  |                                                                                                                                                                                         |   |   |   |   |   |   |  |  |   |   |
|                           | Believed women more likely to be at ease with screening offers, given their experiences of cervical screening and contraception appointments              |   | ✓ |   |   |   |  | ✓ |  |                                                                                                                                                                                         |   |   |   |   |   |   |  |  |   |   |
| Ma & Clarke (2005)        | Financial remuneration - extra workload due to screening but others questioned how remuneration could be justified if the screening test is free          |   |   | ✓ |   |   |  | ✓ |  | Reduce the need to talk about sex, i.e., "blanket" screening policy                                                                                                                     | ✓ | ✓ | ✓ |   |   |   |  |  |   | ✓ |
|                           | Time pressure                                                                                                                                             |   | ✓ | ✓ |   |   |  | ✓ |  | Ease of administering a test: urine tests for men and self-taken vulval-vaginal swabs for women might increase acceptance for screening and would lessen impact on clinicians' workload | ✓ | ✓ | ✓ |   |   |   |  |  | ✓ | ✓ |
|                           | Concerned about the volume of partner notification from the screening                                                                                     |   |   | ✓ |   |   |  | ✓ |  | Awareness campaign for public and professionals to de-stigmatise                                                                                                                        | ✓ | ✓ | ✓ |   | ✓ |   |  |  |   | ✓ |
|                           | Urine tests for men and self-taken vulval-vaginal swabs are more expensive and technically difficult - not all of the local laboratories can process them |   |   | ✓ |   |   |  | ✓ |  | Training to be confident with raising screening opportunistically                                                                                                                       |   | ✓ | ✓ | ✓ |   | ✓ |  |  |   |   |
|                           |                                                                                                                                                           |   |   |   |   |   |  |   |  | Multidisciplinary training events on topics such as confidentiality, under-16s and wider sexual health issues                                                                           |   | ✓ | ✓ |   | ✓ |   |  |  |   |   |
| McKernon & Azariah (2013) | Clinical difficulties - deciding on treatment (20%)                                                                                                       |   | ✓ |   |   | ✓ |  |   |  | Customisation of the practice management software to support individual staff member's testing knowledge and behaviours                                                                 |   | ✓ |   |   |   |   |  |  |   |   |
|                           | Skills-based difficulties - how to word the offer to test (28%)                                                                                           |   | ✓ |   | ✓ |   |  |   |  | Patient-oriented promotions (posters and pamphlets)                                                                                                                                     |   |   | ✓ |   |   |   |  |  |   | ✓ |
|                           | Contextual difficulties - preserving confidentiality (46%)                                                                                                |   | ✓ |   | ✓ |   |  | ✓ |  | Fostering a culture of shared learning (such as by talking with                                                                                                                         |   | ✓ | ✓ |   | ✓ |   |  |  |   | ✓ |

|                        |                                                                                                                                                  |  |   |   |   |   |   |   |                                                                                                                                                                                                      |   |   |   |   |   |  |   |   |   |
|------------------------|--------------------------------------------------------------------------------------------------------------------------------------------------|--|---|---|---|---|---|---|------------------------------------------------------------------------------------------------------------------------------------------------------------------------------------------------------|---|---|---|---|---|--|---|---|---|
|                        |                                                                                                                                                  |  |   |   |   |   |   |   | other staff about difficulties and learnings, team huddles prior to clinics, and regular reminders)                                                                                                  |   |   |   |   |   |  |   |   |   |
|                        | Operational difficulties - completing tasks within the appointment time (32%)                                                                    |  | ✓ |   |   |   |   | ✓ | Having better privacy at reception and triage areas                                                                                                                                                  | ✓ |   | ✓ |   |   |  |   |   | ✓ |
|                        |                                                                                                                                                  |  |   |   |   |   |   |   | Make chlamydia testing a key performance indicator for the PHO                                                                                                                                       |   |   | ✓ |   |   |  | ✓ | ✓ |   |
|                        |                                                                                                                                                  |  |   |   |   |   |   |   | Expand screening to other settings, such as schools, universities and workplaces                                                                                                                     |   |   | ✓ |   |   |  |   | ✓ | ✓ |
|                        |                                                                                                                                                  |  |   |   |   |   |   |   | Having a screening service run by nurses                                                                                                                                                             |   |   | ✓ |   |   |  |   |   | ✓ |
|                        |                                                                                                                                                  |  |   |   |   |   |   |   | Having more time for screening consistently                                                                                                                                                          |   |   | ✓ |   |   |  |   |   | ✓ |
| McNulty et al. (2004a) | Perceived lack of evidence of the benefits of chlamydia testing                                                                                  |  | ✓ |   |   | ✓ | ✓ |   | Test at smear consultation & send patient leaflets pre-appointment                                                                                                                                   |   |   | ✓ |   |   |  |   |   | ✓ |
|                        | Lack of knowledge of when and how to take specimens                                                                                              |  | ✓ |   | ✓ | ✓ |   |   | Specific clinic for chlamydia tests: properly resourced drop-in clinic                                                                                                                               |   |   | ✓ |   |   |  |   |   | ✓ |
|                        | Lack of time                                                                                                                                     |  | ✓ | ✓ |   |   |   | ✓ | Guidance and education for healthcare staff and patients: particularly for asymptomatic patients; short and clear guidance re background information, and when and how to test for genital chlamydia | ✓ | ✓ | ✓ | ✓ | ✓ |  |   |   |   |
|                        | Discussing chlamydia in consultations unrelated to sexual health: thought that it would upset patients                                           |  | ✓ |   |   |   | ✓ |   | Non-invasive specimens - urine sampling                                                                                                                                                              | ✓ |   | ✓ |   |   |  |   |   | ✓ |
|                        | Inclusion in new patients' health checks: thought that it would hinder development of the doctor-patient relationship                            |  | ✓ |   |   |   | ✓ |   | Develop skills to discuss sexual health                                                                                                                                                              |   | ✓ |   |   | ✓ |  |   |   |   |
|                        | Concerns about discussing chlamydia at cervical smear examination: lack of confidence about the information they should be giving to the patient |  | ✓ |   |   | ✓ | ✓ |   | Clear lines of responsibility for contact tracing                                                                                                                                                    |   |   | ✓ |   |   |  |   |   | ✓ |
|                        | Contact tracing                                                                                                                                  |  | ✓ | ✓ |   |   |   | ✓ | Increase in trained staff in primary care                                                                                                                                                            |   |   | ✓ |   |   |  |   |   | ✓ |

|                        |                                                                                                                                                                                                              |  |   |   |   |   |   |   |   |                                                                                                                                                            |   |   |   |  |   |  |  |   |   |
|------------------------|--------------------------------------------------------------------------------------------------------------------------------------------------------------------------------------------------------------|--|---|---|---|---|---|---|---|------------------------------------------------------------------------------------------------------------------------------------------------------------|---|---|---|--|---|--|--|---|---|
|                        | Attitudes to Department of Health screening programme proposals: did not believe the Department of Health had 'any idea of what really goes on in general practice' or the 'extreme pressures GPs were under |  | ✓ |   |   |   | ✓ |   |   |                                                                                                                                                            |   |   |   |  |   |  |  |   |   |
|                        | Not willing to discuss chlamydia in a consultation unrelated to sexual health                                                                                                                                |  | ✓ |   |   |   |   | ✓ |   |                                                                                                                                                            |   |   |   |  |   |  |  |   |   |
|                        | Lack of guidance                                                                                                                                                                                             |  |   | ✓ |   |   |   |   | ✓ |                                                                                                                                                            |   |   |   |  |   |  |  |   |   |
| McNulty et al. (2004b) | Lack of confidence in managing men with genitourinary symptoms                                                                                                                                               |  | ✓ |   |   |   | ✓ |   |   | Incorporating testing into routine practice (e.g., vaginal swabs)                                                                                          |   |   | ✓ |  |   |  |  | ✓ |   |
|                        | Lack of communication with sexual health clinics                                                                                                                                                             |  |   | ✓ |   |   |   | ✓ |   | Having a GP staff member who had an interest in sexual health, had attended continuing education or participated in specialist training in family planning |   | ✓ | ✓ |  | ✓ |  |  | ✓ |   |
|                        | Differing thresholds for testing: low testing practices only considered testing after multiple consultations with symptoms                                                                                   |  |   | ✓ |   |   |   | ✓ |   | Availability of patient information leaflets on chlamydia                                                                                                  |   |   | ✓ |  |   |  |  | ✓ |   |
|                        | Lack of knowledge around epidemiology and presentation of chlamydia, and accuracy of testing                                                                                                                 |  | ✓ |   |   | ✓ |   |   |   | Awareness of risk of chlamydia among practice population                                                                                                   | ✓ |   |   |  | ✓ |  |  |   |   |
|                        | Perception that practice population is at low risk, due to age and rural status                                                                                                                              |  | ✓ |   |   |   | ✓ |   |   |                                                                                                                                                            |   |   |   |  |   |  |  |   |   |
| McNulty et al. (2010)  | Lack of support from entire practice team and chlamydia screening had not become the norm                                                                                                                    |  | ✓ | ✓ |   |   |   |   | ✓ | Offer screening at new patient checks                                                                                                                      |   |   | ✓ |  |   |  |  | ✓ |   |
|                        | Not comfortable raising chlamydia screening: fear it could cause offence and                                                                                                                                 |  | ✓ |   |   |   | ✓ |   |   | Normal practice to offer most patients screening (normalisation)                                                                                           |   |   | ✓ |  |   |  |  |   | ✓ |
|                        | Insufficient training                                                                                                                                                                                        |  | ✓ |   | ✓ | ✓ |   |   |   | Regular practice meetings and ongoing support from NCSP coordinators                                                                                       |   |   | ✓ |  |   |  |  | ✓ | ✓ |
|                        | Receptionists were not trained appropriately                                                                                                                                                                 |  | ✓ | ✓ | ✓ |   |   |   |   | Easy availability of screening kits would save time - leave packs in reception area                                                                        |   |   | ✓ |  |   |  |  | ✓ |   |

|                       |                                                                                                                                                                                                                                   |  |   |   |   |  |   |   |  |                                                                                                                                                                                              |   |   |   |  |   |  |   |   |
|-----------------------|-----------------------------------------------------------------------------------------------------------------------------------------------------------------------------------------------------------------------------------|--|---|---|---|--|---|---|--|----------------------------------------------------------------------------------------------------------------------------------------------------------------------------------------------|---|---|---|--|---|--|---|---|
|                       | Receptionists did not have sufficient time                                                                                                                                                                                        |  |   | ✓ |   |  |   | ✓ |  | Computer templates reminders/alert - but be aware of prompt fatigue                                                                                                                          |   |   | ✓ |  |   |  | ✓ |   |
|                       | Poor relationship with NCSP coordinator                                                                                                                                                                                           |  |   | ✓ |   |  |   | ✓ |  | Simplified request forms                                                                                                                                                                     |   |   | ✓ |  |   |  | ✓ |   |
|                       | Confidentiality issues: reception area not confidential enough for receptionists to discuss chlamydia screening with patients                                                                                                     |  |   | ✓ |   |  |   | ✓ |  | Increase staff awareness of targets and QOF: if chlamydia was included in the QOF priorities, they would consider it more important and develop a much more systematic approach to screening |   | ✓ | ✓ |  | ✓ |  | ✓ |   |
|                       | Time pressures: reluctant to extend consultations                                                                                                                                                                                 |  |   | ✓ |   |  |   | ✓ |  | Nurse led approach                                                                                                                                                                           |   |   | ✓ |  |   |  | ✓ |   |
|                       | Forgetfulness                                                                                                                                                                                                                     |  |   | ✓ | ✓ |  |   |   |  | Would be easier if patients were made more aware of screening through increased use of leaflets and posters                                                                                  | ✓ | ✓ | ✓ |  | ✓ |  | ✓ |   |
|                       | Recording offers of screens: no computer Read codes to record chlamydia screening was offered chlamydia screening and if the patient had agreed or declined, therefore it would be difficult to audit screening offers and uptake |  |   | ✓ |   |  |   | ✓ |  | Time pressures: easy availability of screening kits would save time; leave packs in reception area                                                                                           |   |   | ✓ |  |   |  | ✓ |   |
| McNulty et al. (2008) | Written invitations for chlamydia screening to the target population - disappointing results unless it was combined with another high-profile public health interventionsuch as the mumps immunization programme                  |  |   | ✓ |   |  |   | ✓ |  | Having a practice champion, who drives the screening process forward and maintains the motivation of other practice staff                                                                    |   |   | ✓ |  | ✓ |  | ✓ | ✓ |
|                       | Perceived increase in workload                                                                                                                                                                                                    |  | ✓ |   |   |  | ✓ |   |  | Normalise screening - part of everyday practice - at all consultations all at-risk patients, not just those involving sexual health                                                          | ✓ |   | ✓ |  |   |  |   | ✓ |
|                       | Lack of comfort in discussing sexual health in consultations un-related to sexual health                                                                                                                                          |  | ✓ |   |   |  | ✓ |   |  | Computer-generated reminders that flagged up patients in the target age group (time-saving method)                                                                                           |   |   | ✓ |  |   |  | ✓ |   |
|                       |                                                                                                                                                                                                                                   |  |   |   |   |  |   |   |  | Patient-completed screening kits - offered either by receptionists when patients booked in, or by health-care staff after a                                                                  | ✓ |   | ✓ |  |   |  | ✓ |   |



|  |  |  |  |  |  |  |  |  |  |  |                                                                                                                                                                                 |  |   |   |  |   |  |  |   |   |
|--|--|--|--|--|--|--|--|--|--|--|---------------------------------------------------------------------------------------------------------------------------------------------------------------------------------|--|---|---|--|---|--|--|---|---|
|  |  |  |  |  |  |  |  |  |  |  | consultation, and then picked up by patients in the clinical and/or reception area (time-saving method)                                                                         |  |   |   |  |   |  |  |   |   |
|  |  |  |  |  |  |  |  |  |  |  | Screening when new patients register                                                                                                                                            |  |   | ✓ |  |   |  |  | ✓ |   |
|  |  |  |  |  |  |  |  |  |  |  | Chlamydia screening sustained through frequent reminders, newsletters containing chlamydia screening rates, and advertising to the 'at-risk' population from the screening team |  |   | ✓ |  |   |  |  | ✓ |   |
|  |  |  |  |  |  |  |  |  |  |  | Programme needs to have a high national and local profile through: support from PCTs (CCGs) and local medical committees                                                        |  |   | ✓ |  |   |  |  | ✓ |   |
|  |  |  |  |  |  |  |  |  |  |  | promotional materials/media campaign for target population                                                                                                                      |  |   | ✓ |  | ✓ |  |  |   | ✓ |
|  |  |  |  |  |  |  |  |  |  |  | A flexible approach to the screening process: allow practices to adopt a screening policy that suited their practice layout, staffing, surgery times and population             |  |   | ✓ |  |   |  |  | ✓ |   |
|  |  |  |  |  |  |  |  |  |  |  | Targets should be set for practices to encourage screening                                                                                                                      |  |   | ✓ |  |   |  |  | ✓ |   |
|  |  |  |  |  |  |  |  |  |  |  | Some supported incentive/payment - others did not, should be providing screening as part of their clinical governance service provision without extra payment                   |  |   | ✓ |  |   |  |  | ✓ |   |
|  |  |  |  |  |  |  |  |  |  |  | Chlamydia screening as a core requirement of the General Medical Services contract                                                                                              |  |   | ✓ |  |   |  |  |   | ✓ |
|  |  |  |  |  |  |  |  |  |  |  | Rural practices: providing chlamydia screening with contraception advice                                                                                                        |  |   | ✓ |  |   |  |  |   | ✓ |
|  |  |  |  |  |  |  |  |  |  |  | Ongoing training of staff: Older male GPs need specific education due to age gap and cultural barriers between them                                                             |  | ✓ | ✓ |  | ✓ |  |  |   |   |

|                       |                                                                                                                                                                                                                 |   |   |   |   |   |   |   |   |  |                                                                                                                           |   |   |   |   |   |  |   |   |
|-----------------------|-----------------------------------------------------------------------------------------------------------------------------------------------------------------------------------------------------------------|---|---|---|---|---|---|---|---|--|---------------------------------------------------------------------------------------------------------------------------|---|---|---|---|---|--|---|---|
|                       |                                                                                                                                                                                                                 |   |   |   |   |   |   |   |   |  | and the target population                                                                                                 |   |   |   |   |   |  |   |   |
|                       |                                                                                                                                                                                                                 |   |   |   |   |   |   |   |   |  | Receptionists, if involved, need specific education package                                                               |   | ✓ |   |   | ✓ |  |   |   |
| McNulty et al. (2017) | Difficult to ask about sexual health in an unrelated consultation                                                                                                                                               |   | ✓ |   |   |   |   | ✓ |   |  | Need for an update on sexual health and chlamydia, how to test, treatment and partner notification                        |   | ✓ |   | ✓ | ✓ |  |   |   |
|                       | Perceived that not many young patients attended, especially young men.                                                                                                                                          |   | ✓ |   |   |   |   | ✓ |   |  | Posters, invitation cards, leaflets and information on practice websites would facilitate testing                         | ✓ |   | ✓ |   | ✓ |  |   | ✓ |
|                       | Perception that patients were not at risk                                                                                                                                                                       |   | ✓ |   |   |   |   | ✓ |   |  | Time barrier could be decreased if GP staff were taught how to make the offer using short scripts of common consultations |   | ✓ |   | ✓ |   |  |   |   |
|                       | Perception that patients preferred to seek sexual health services elsewhere                                                                                                                                     |   | ✓ |   |   |   |   | ✓ |   |  | Computer prompts or templates                                                                                             |   |   | ✓ |   | ✓ |  |   |   |
|                       | Believed that patients would be concerned about confidentiality                                                                                                                                                 |   | ✓ |   |   |   |   | ✓ |   |  | Enthusiastic about self-taken vaginal swabs                                                                               |   |   | ✓ |   |   |  |   | ✓ |
|                       | GP staff perception that patients need to request a test                                                                                                                                                        |   | ✓ |   |   |   | ✓ | ✓ |   |  | Patients should do the test in practice to increase number of tests returned                                              | ✓ |   | ✓ |   |   |  |   | ✓ |
|                       | Time and pressures of other waiting patients                                                                                                                                                                    |   | ✓ | ✓ |   |   |   |   | ✓ |  | Receiving feedback on testing rates                                                                                       |   |   | ✓ |   |   |  | ✓ |   |
|                       | Forgetting                                                                                                                                                                                                      |   | ✓ |   |   |   | ✓ |   |   |  | Involving receptionists                                                                                                   |   |   | ✓ |   |   |  |   | ✓ |
|                       | Limited funding for testing meant staff were less likely to offer tests in comparison to paid for public health interventions                                                                                   |   | ✓ |   |   |   |   | ✓ |   |  |                                                                                                                           |   |   |   |   |   |  |   |   |
|                       | Many GP staff were not completely aware of the exact specimen collection procedures                                                                                                                             |   | ✓ |   | ✓ | ✓ |   |   |   |  |                                                                                                                           |   |   |   |   |   |  |   |   |
|                       | Concern about patients actually returning the self-sample kits                                                                                                                                                  | ✓ | ✓ |   |   |   |   | ✓ |   |  |                                                                                                                           |   |   |   |   |   |  |   |   |
| Merritt et al. (2007) | Insufficient time during a standard consultation. Considered particularly time consuming when dealing with patients with limited or no previous knowledge of chlamydia, and pre-test counselling was considered | ✓ | ✓ | ✓ |   |   | ✓ |   | ✓ |  | A performance-related financial incentive for GPs (similar to those offered for childhood immunisation in Australia)      |   |   | ✓ |   |   |  | ✓ |   |

|                        |                                                                                                                                                                                              |   |   |   |   |   |   |   |   |   |                                                                                                                                  |                                                                                                       |   |   |   |   |   |  |   |   |
|------------------------|----------------------------------------------------------------------------------------------------------------------------------------------------------------------------------------------|---|---|---|---|---|---|---|---|---|----------------------------------------------------------------------------------------------------------------------------------|-------------------------------------------------------------------------------------------------------|---|---|---|---|---|--|---|---|
|                        | enormously time intensive                                                                                                                                                                    |   |   |   |   |   |   |   |   |   |                                                                                                                                  |                                                                                                       |   |   |   |   |   |  |   |   |
|                        | Forgetting to consider testing in the target group                                                                                                                                           |   | ✓ |   |   | ✓ |   |   |   |   | Increased community awareness of chlamydia                                                                                       | ✓                                                                                                     |   | ✓ |   | ✓ |   |  |   |   |
|                        | Difficulty in raising the concept of chlamydia testing during unrelated consultations, particularly for males and patients who were very ill                                                 |   | ✓ |   |   |   | ✓ |   | ✓ |   | A simplified process for data feedback from pathology providers to monitor testing performance for each practice or practitioner |                                                                                                       |   | ✓ |   |   |   |  | ✓ |   |
| Perkins et al. (2003)  | GPs reluctant to manage test results because of the potential impact on their work-load                                                                                                      |   | ✓ |   |   |   |   | ✓ |   |   | Giving out forms and leaflets at reception saved time                                                                            |                                                                                                       |   | ✓ |   |   |   |  | ✓ |   |
|                        | Older male colleagues were not comfortable with sexual health work                                                                                                                           |   | ✓ |   |   |   | ✓ |   |   |   | PN could take on screening responsibilities                                                                                      |                                                                                                       |   | ✓ |   |   |   |  | ✓ |   |
|                        | No consensus regarding adequacy of payment among the GPs                                                                                                                                     |   |   | ✓ |   |   | ✓ |   |   |   | PN believed that young women were more comfortable with them screening than GP                                                   |                                                                                                       | ✓ |   |   |   | ✓ |  |   |   |
|                        | Receptionists - felt ill equipped for sexual health discussions (no medical training) and unsuitably located (in public space) for privacy and confidentiality                               | ✓ | ✓ |   | ✓ | ✓ |   |   |   | ✓ |                                                                                                                                  | Contact tracing and partner notification - believe this is better undertaken by sexual health clinics |   |   | ✓ |   |   |  |   | ✓ |
|                        | Potential for embarrassment if parent or partner present                                                                                                                                     | ✓ |   |   |   |   |   | ✓ |   |   |                                                                                                                                  |                                                                                                       |   |   |   |   |   |  |   |   |
|                        | Focus exclusively on women - potential to cause offence and damage self-esteem by suggesting sexual activity or promiscuity; reduces men's responsibility for sexual and reproductive health | ✓ |   |   | ✓ |   |   | ✓ | ✓ |   |                                                                                                                                  |                                                                                                       |   |   |   |   |   |  |   |   |
|                        | Potential for test to be offered more than once - could cause offence to patient                                                                                                             | ✓ |   |   | ✓ |   |   | ✓ |   |   |                                                                                                                                  |                                                                                                       |   |   |   |   |   |  |   |   |
|                        | Belief that men rarely attended, little experience of any sexual health work with young men, and would be reticent about offering them screening                                             |   |   | ✓ |   |   |   | ✓ |   |   |                                                                                                                                  |                                                                                                       |   |   |   |   |   |  |   |   |
| Ricketts et al. (2016) | Forgetting to offer chlamydia screen                                                                                                                                                         |   | ✓ |   |   | ✓ |   |   |   |   | Using computer prompts and posters, and identify individual to take this forward                                                 |                                                                                                       |   | ✓ |   |   |   |  | ✓ |   |
|                        | Not wishing to offer chlamydia                                                                                                                                                               |   | ✓ |   |   |   |   | ✓ |   |   | Staff changing the way they                                                                                                      |                                                                                                       | ✓ | ✓ | ✓ |   |   |  | ✓ |   |

|             |                                                                                                                                                                             |   |   |   |   |   |   |  |   |                                                                                                                                                             |   |   |   |   |   |   |   |   |
|-------------|-----------------------------------------------------------------------------------------------------------------------------------------------------------------------------|---|---|---|---|---|---|--|---|-------------------------------------------------------------------------------------------------------------------------------------------------------------|---|---|---|---|---|---|---|---|
|             | screening in non-sexual health consultations                                                                                                                                |   |   |   |   |   |   |  |   | offer a chlamydia screen by stating that they are testing everyone aged between 15 and 24, and having a general prompt (and a narrated phrase) for all ages |   |   |   |   |   |   |   |   |
|             | When sexual health is a low priority in the general practice - participants' own views were a barrier to increasing chlamydia screening in their practice                   |   | ✓ |   |   |   |   |  | ✓ | Having a designated general practice lead to drive screening and send around reminders and forward newsletters to all staff                                 |   |   | ✓ |   |   |   |   | ✓ |
|             | Saw it as not always appropriate to raise chlamydia screening; if a parent was present, if the patient was not consulting about sexual health, or if it didn't 'feel' right |   | ✓ |   |   | ✓ | ✓ |  | ✓ | Use scripts; increases confidence and fluency in making the offer                                                                                           |   | ✓ |   |   |   | ✓ |   |   |
|             | Concerned that patients would be irritated by the offer                                                                                                                     |   | ✓ |   |   |   | ✓ |  |   | Posters to refer to, kits easily accessible and invitation cards available to give to patients                                                              |   |   | ✓ |   |   |   |   | ✓ |
|             | Perception of time involved in offering chlamydia screen, and monitoring screening rates                                                                                    |   | ✓ |   |   | ✓ |   |  |   | Audits as part of professional development of all staff                                                                                                     |   |   | ✓ |   |   |   | ✓ | ✓ |
|             | Patients not returning the chlamydia test                                                                                                                                   | ✓ |   |   | ✓ |   |   |  |   | Feeding back that other general practice staff ask the patient to do the test prior to leaving the general practice, and this is what patients want too     | ✓ | ✓ | ✓ |   | ✓ |   |   | ✓ |
|             | Ongoing perception that patients may be irritated if they are offered screening                                                                                             |   | ✓ |   |   | ✓ |   |  |   | Stress patients views in the training, lead to facilitate ongoing discussions in general practice around feedback from patients                             | ✓ |   |   |   | ✓ |   |   |   |
|             | Lack of privacy in reception area to give out invitation cards                                                                                                              |   |   | ✓ |   |   |   |  | ✓ | Offer should be made to all in age group so not seen as judgemental by staff                                                                                |   | ✓ |   |   |   |   |   | ✓ |
|             | Targets being too high for general practices with very low screening rates                                                                                                  |   |   | ✓ |   |   | ✓ |  |   | Teach receptionists to use script                                                                                                                           |   | ✓ | ✓ | ✓ |   |   |   |   |
|             |                                                                                                                                                                             |   |   |   |   |   |   |  |   | Realistic screening rates for individual general practices with numbers and actions needed to attain them                                                   |   |   | ✓ |   |   |   | ✓ |   |
| Robertson & | Lack of confidence                                                                                                                                                          |   | ✓ |   |   | ✓ |   |  |   | Would do if funded                                                                                                                                          |   |   | ✓ |   |   |   | ✓ |   |

|                       |                                                                                         |   |   |   |   |   |   |   |                                           |                                                           |   |   |   |   |   |   |   |   |   |
|-----------------------|-----------------------------------------------------------------------------------------|---|---|---|---|---|---|---|-------------------------------------------|-----------------------------------------------------------|---|---|---|---|---|---|---|---|---|
| Williams (2005)       | Lack of knowledge (how to use swabs)                                                    |   | ✓ | ✓ |   | ✓ |   |   |                                           | Would undertake testing if trained                        |   | ✓ | ✓ | ✓ | ✓ |   |   |   |   |
|                       | Lack of training                                                                        |   | ✓ | ✓ | ✓ |   |   |   |                                           |                                                           |   |   |   |   |   |   |   |   |   |
|                       | Lack of time                                                                            |   | ✓ | ✓ |   |   |   |   | ✓                                         |                                                           |   |   |   |   |   |   |   |   |   |
| Senok et al. (2005)   | How to change the focus of the consultation to chlamydia testing                        |   | ✓ |   | ✓ |   |   |   |                                           |                                                           |   |   |   |   |   |   |   |   |   |
|                       | Felt it was inappropriate (especially if consultation involved a mental health problem) |   | ✓ |   |   |   | ✓ |   | ✓                                         |                                                           |   |   |   |   |   |   |   |   |   |
|                       | Concerns about the time required to raise the issue of chlamydia                        |   | ✓ |   |   |   |   |   | ✓                                         |                                                           |   |   |   |   |   |   |   |   |   |
|                       | Postal screening - confidentiality of testing kit recipient                             | ✓ |   |   |   |   | ✓ |   | ✓                                         |                                                           |   |   |   |   |   |   |   |   |   |
|                       | Postal screening - test kits were bulky and difficult to post                           |   |   | ✓ |   |   |   |   | ✓                                         |                                                           |   |   |   |   |   |   |   |   |   |
| Wallace et al. (2012) | Additional time in consultation                                                         |   | ✓ | ✓ |   |   |   |   | ✓                                         | Surgery signing up as a whole                             |   |   | ✓ |   |   |   |   | ✓ | ✓ |
|                       | Patient attending with parents                                                          | ✓ | ✓ |   |   |   | ✓ | ✓ |                                           | Training on the benefits of screening                     |   | ✓ | ✓ |   | ✓ |   |   |   |   |
|                       | Comprehension barriers                                                                  | ✓ |   |   |   | ✓ |   |   |                                           | Knowledge about treatment                                 |   | ✓ | ✓ |   | ✓ |   |   |   |   |
|                       | Patient presents with an issue unrelated to sexual health                               |   | ✓ |   |   |   | ✓ |   |                                           | Raising awareness via well-displayed posters and leaflets | ✓ |   | ✓ |   | ✓ |   |   |   |   |
|                       | Language barriers                                                                       | ✓ |   |   |   | ✓ |   |   |                                           | Knowing how to deal with a positive result                |   | ✓ |   |   | ✓ |   |   |   |   |
|                       | Problems around contact tracing                                                         |   |   | ✓ |   |   |   |   | ✓                                         | Consultation skills                                       |   | ✓ |   |   | ✓ |   |   |   |   |
|                       | Lack of time in consultations                                                           |   | ✓ | ✓ |   |   |   |   | ✓                                         | Patient presents with a sexual health issue               | ✓ | ✓ |   |   |   |   | ✓ |   |   |
|                       | Lack of support by colleagues                                                           |   |   | ✓ |   |   |   |   | ✓                                         | Patient attending for cervical screening                  | ✓ | ✓ |   |   |   |   | ✓ |   |   |
|                       | Patients being unwilling to talk about STIs                                             | ✓ |   |   |   |   | ✓ |   |                                           | Patient attending for contraceptive pill check            | ✓ | ✓ |   |   |   |   | ✓ |   |   |
|                       |                                                                                         |   |   |   |   |   |   |   | Patient attending to obtain contraception | ✓                                                         | ✓ |   |   |   |   | ✓ |   |   |   |

Note: CCG = clinical commissioning group; GP = general practitioner; NCSP = National Chlamydia Screening Programme; PCT = primary care trust; PN = practice nurse; STI = sexually transmitted infection; QOF = quality and outcomes framework
