# Supplementary material for: Application of the COM-B model to barriers and facilitators to chlamydia testing in general practice for young people and primary care practitioners: a systematic review
Source: Springer Nature journal article supplement (doi:10.1186/s13012-018-0821-y), 2018-10-22
Supplement: MOESM4 [file 16217436]

**Additional File 4.** Findings of included studies with young people, by level (young people, provider, service), and sub-component (COM-B)

Heading abbreviations: COM-B = capability, opportunity, motivation, behaviour; Y = young people; P = provider level; S = service level; PhC = physical capability; PsC = psychological capability; RM = reflective motivation; AM = automatic motivation; PO = physical opportunity; SO = social opportunity

| Source              | Barriers                                                                                                                                                          | Level |   |   | COM-B Subcomponent |     |    |    |    |    | Facilitators                                                                                                 | Level                                                                                     |   |   | COM-B Subcomponent |     |    |    |    |    |
|---------------------|-------------------------------------------------------------------------------------------------------------------------------------------------------------------|-------|---|---|--------------------|-----|----|----|----|----|--------------------------------------------------------------------------------------------------------------|-------------------------------------------------------------------------------------------|---|---|--------------------|-----|----|----|----|----|
|                     |                                                                                                                                                                   | Y     | P | S | PhC                | PsC | RM | AM | PO | SO |                                                                                                              | Y                                                                                         | P | S | PhC                | PsC | RM | AM | PO | SO |
| Balfe et al. (2009) | Stigma, embarrassment and shame about the potential social consequences of being known to attend a health service for testing, discredit young adults' identities | ✓     |   |   |                    |     |    | ✓  |    | ✓  | Seeing testing as a responsible practice that adults should engage in                                        | ✓                                                                                         |   |   |                    |     | ✓  |    |    |    |
|                     | Embarrassment: the testing process, having to take clothes off in front of healthcare professional (stronger for women)                                           | ✓     |   |   |                    |     |    | ✓  |    | ✓  | Moral obligation                                                                                             | ✓                                                                                         |   |   |                    |     | ✓  |    |    |    |
|                     | Shame: had unprotected sex and were ashamed, concerned healthcare provider would judge them and behaviour                                                         | ✓     |   |   |                    |     |    |    | ✓  |    | ✓                                                                                                            | Concerns about the damage an infection could do to future fertility                       | ✓ |   |                    |     |    | ✓  |    |    |
|                     | No symptoms therefore not urgent                                                                                                                                  | ✓     |   |   |                    |     |    |    | ✓  |    |                                                                                                              | Perceived risk status of respondents' sexual partners                                     | ✓ |   |                    |     |    | ✓  |    |    |
|                     | Cost                                                                                                                                                              | ✓     |   | ✓ |                    |     |    |    |    | ✓  |                                                                                                              | Anxieties about the risk that asymptomatic STIs could affect them without their knowledge | ✓ |   |                    |     |    | ✓  |    |    |
| Balfe et al. (2010) | Testing seen as a threat to young women's identities: anxieties about promiscuity (risk takers) and identity discreditation                                       | ✓     |   |   |                    |     |    | ✓  |    |    | Preference for testing offers from younger female healthcare professions, not receptionist                   | ✓                                                                                         |   | ✓ |                    |     |    |    |    | ✓  |
|                     | Would not accept tests from 'para-professionals' (healthcare professionals who were not doctors nor nurses) who worked in public settings (reception areas).      | ✓     |   | ✓ |                    |     |    |    | ✓  |    | Test offered in private areas, rather than in more public settings (e.g., reception areas)                   | ✓                                                                                         |   |   |                    |     |    |    |    | ✓  |
|                     | Offers framed in moral surveillance style, undermined identities were likely to be rejected                                                                       | ✓     |   |   |                    |     |    | ✓  |    |    | More likely to accept if emphasised that testing is a normal practice and is a good, responsible thing to do | ✓                                                                                         | ✓ |   |                    |     |    | ✓  |    |    |
|                     | Stigma of having an infection                                                                                                                                     | ✓     |   |   |                    |     |    |    |    | ✓  |                                                                                                              |                                                                                           |   |   |                    |     |    |    |    |    |
| Brugha et al.       | Testing located in pharmacies and public non-health care                                                                                                          | ✓     |   | ✓ |                    |     |    |    | ✓  |    | Most women wanted to be offered test by a female                                                             | ✓                                                                                         | ✓ |   |                    |     |    | ✓  |    | ✓  |

|                         |                                                                                              |   |   |   |  |  |  |   |   |                                                                                                                       |   |   |   |  |   |   |   |   |
|-------------------------|----------------------------------------------------------------------------------------------|---|---|---|--|--|--|---|---|-----------------------------------------------------------------------------------------------------------------------|---|---|---|--|---|---|---|---|
| (2011)                  | settings                                                                                     |   |   |   |  |  |  |   |   | healthcare professional (65%)                                                                                         |   |   |   |  |   |   |   |   |
|                         | Cost                                                                                         | ✓ |   | ✓ |  |  |  | ✓ |   | Most wanted to be offered test by a doctor (75%), 50% of males and 80% of would feel comfortable being test by nurses | ✓ | ✓ |   |  |   |   |   | ✓ |
|                         |                                                                                              |   |   |   |  |  |  |   |   | Preference for urine-based test (90%)                                                                                 | ✓ |   | ✓ |  |   |   |   | ✓ |
| Ewert et al. (2016)     | Embarrassment: talking to someone about personal information                                 | ✓ |   |   |  |  |  | ✓ |   | Increase education: sexual health education in schools                                                                | ✓ |   | ✓ |  | ✓ |   |   |   |
|                         | Embarrassment: if others and parents were to find out                                        | ✓ |   |   |  |  |  | ✓ | ✓ | Increase awareness: public health campaigns, e.g., TV advertising                                                     | ✓ |   | ✓ |  | ✓ |   |   | ✓ |
| Heritage & Jones (2008) | Tests offered by receptionists                                                               |   |   | ✓ |  |  |  | ✓ |   | Preference for urine samples over self-taken vulval swabs                                                             | ✓ |   | ✓ |  |   |   |   | ✓ |
|                         | Policy targeting females only                                                                |   |   | ✓ |  |  |  |   | ✓ |                                                                                                                       |   |   |   |  |   |   |   |   |
|                         | Embarrassment and fear                                                                       | ✓ |   |   |  |  |  | ✓ |   |                                                                                                                       |   |   |   |  |   |   |   |   |
|                         | Partner tracing caused concern                                                               | ✓ |   |   |  |  |  | ✓ | ✓ |                                                                                                                       |   |   |   |  |   |   |   |   |
|                         | Lack of privacy in reception area                                                            | ✓ |   | ✓ |  |  |  | ✓ | ✓ |                                                                                                                       |   |   |   |  |   |   |   |   |
|                         | Parent being present during consultation                                                     | ✓ |   |   |  |  |  |   | ✓ |                                                                                                                       |   |   |   |  |   |   |   |   |
| Hogan et al. (2010)     | Embarrassment: to admit to unprotected sex                                                   | ✓ |   |   |  |  |  | ✓ |   | Raise awareness: marketing campaigns, posters, letters, leaflets and staff talking to the patients about testing      |   | ✓ | ✓ |  | ✓ |   |   |   |
|                         | Embarrassment: in case they were seen by someone they knew                                   | ✓ |   |   |  |  |  | ✓ | ✓ | Characteristic of doctor or nurse: non-judgemental                                                                    |   | ✓ |   |  |   | ✓ |   | ✓ |
|                         | Fear of being judged by the staff at the surgery and fear of parents finding out             | ✓ |   |   |  |  |  | ✓ | ✓ | Preference for providing the sample immediately at the practice rather than home                                      | ✓ |   | ✓ |  |   |   |   | ✓ |
|                         | Scared of results: prefer to ignore the issue, easier when no symptoms                       | ✓ |   |   |  |  |  | ✓ |   |                                                                                                                       |   |   |   |  |   |   |   |   |
|                         | Time constraints                                                                             | ✓ | ✓ | ✓ |  |  |  |   | ✓ |                                                                                                                       |   |   |   |  |   |   |   |   |
| Jones et al. (2017)     | Staff judgemental attitude and being singled out as 'needing' a chlamydia test               | ✓ |   |   |  |  |  | ✓ |   | Increasing patient awareness of service                                                                               | ✓ |   |   |  | ✓ |   |   |   |
|                         | Embarrassment: having to walk through reception with sample                                  | ✓ |   | ✓ |  |  |  | ✓ | ✓ | Mode of testing                                                                                                       | ✓ |   | ✓ |  |   |   |   | ✓ |
|                         | Inappropriate in an unrelated consultation if the patient is religious - could cause offence | ✓ |   |   |  |  |  |   | ✓ | Routine testing offered to all in age group in all consultations                                                      | ✓ |   | ✓ |  |   |   | ✓ | ✓ |

|                           |                                                                                                                                               |   |   |   |  |   |   |   |   |                                                                                                                              |   |   |   |  |  |  |  |  |   |
|---------------------------|-----------------------------------------------------------------------------------------------------------------------------------------------|---|---|---|--|---|---|---|---|------------------------------------------------------------------------------------------------------------------------------|---|---|---|--|--|--|--|--|---|
|                           | Time: testing in an unrelated consultation takes time away from their original reason for attending, thereby reducing quality of consultation | ✓ |   | ✓ |  |   |   |   | ✓ |                                                                                                                              |   |   |   |  |  |  |  |  |   |
|                           | Forgetting to return home testing kits                                                                                                        | ✓ |   |   |  | ✓ |   |   |   |                                                                                                                              |   |   |   |  |  |  |  |  |   |
| Mac Phail et al. (2017)   |                                                                                                                                               |   |   |   |  |   |   |   |   | Medical provider offered a test                                                                                              |   | ✓ |   |  |  |  |  |  | ✓ |
|                           |                                                                                                                                               |   |   |   |  |   |   |   |   | Cost - free                                                                                                                  |   |   | ✓ |  |  |  |  |  | ✓ |
|                           |                                                                                                                                               |   |   |   |  |   |   |   |   | Annual reminder to test via email (>50%) or text message (40%)                                                               |   |   | ✓ |  |  |  |  |  | ✓ |
| Mills et al. (2006)       | Embarrassment with sexual health issues and associations with promiscuity                                                                     | ✓ |   |   |  |   |   | ✓ | ✓ | Understanding of benefits of testing                                                                                         | ✓ |   |   |  |  |  |  |  | ✓ |
|                           | Participants may not consider themselves at risk                                                                                              | ✓ |   |   |  |   |   | ✓ |   |                                                                                                                              |   |   |   |  |  |  |  |  |   |
|                           | Unease with vulvo-vaginal swab                                                                                                                | ✓ |   | ✓ |  |   |   |   | ✓ |                                                                                                                              |   |   |   |  |  |  |  |  |   |
|                           | Anxiety: in relation to all stages of the testing process, from offer to receiving results                                                    | ✓ |   |   |  |   |   |   | ✓ |                                                                                                                              |   |   |   |  |  |  |  |  |   |
|                           | Stigma                                                                                                                                        | ✓ |   |   |  |   |   |   |   | ✓                                                                                                                            |   |   |   |  |  |  |  |  |   |
| Norman sell et al. (2016) | Fear of having identity 'tainted' or 'spoiled' by the need to get tested                                                                      | ✓ |   |   |  |   |   | ✓ |   |                                                                                                                              |   |   |   |  |  |  |  |  |   |
|                           | Fear of positive result                                                                                                                       | ✓ |   |   |  |   |   | ✓ | ✓ |                                                                                                                              |   |   |   |  |  |  |  |  |   |
|                           | Judgemental attitudes of healthcare professionals                                                                                             |   | ✓ |   |  |   |   | ✓ | ✓ |                                                                                                                              |   |   |   |  |  |  |  |  |   |
|                           | Perception that GPs lack sufficient expertise in sexual health                                                                                | ✓ | ✓ |   |  | ✓ | ✓ |   |   |                                                                                                                              |   |   |   |  |  |  |  |  |   |
|                           | Patient cultural and religious factors                                                                                                        | ✓ |   |   |  |   |   | ✓ |   | ✓                                                                                                                            |   |   |   |  |  |  |  |  |   |
| Pavlin et al. (2008)      | Confronting nature of being tested for chlamydia and fear of the infection                                                                    | ✓ |   |   |  |   |   | ✓ |   | Age-based testing (16-24 years) acceptable and non-discriminatory                                                            | ✓ |   | ✓ |  |  |  |  |  | ✓ |
|                           | If diagnosed with chlamydia concerned would be judged and seen as sexually promiscuous, feel embarrassed and ashamed                          | ✓ |   |   |  |   |   | ✓ | ✓ | Introducing chlamydia during a sexual health-related consultation is appropriate                                             | ✓ | ✓ |   |  |  |  |  |  | ✓ |
|                           | Being required to disclose their sexual history                                                                                               | ✓ |   | ✓ |  |   |   |   | ✓ | Normalisation: frame as a public health issue that is openly discussed rather than an issue that relates to the behaviour of | ✓ | ✓ | ✓ |  |  |  |  |  | ✓ |
